# Supplementary material
Source: HighWire-hosted journal article supplement (https://www.cmaj.ca/highwire/filestream/58218/field_highwire_adjunct_files/0/cvb-mout-1-at_online.pdf)
Supplement: cvb-mout-1-at_online.pdf [file cvb-mout-1-at_online.pdf]

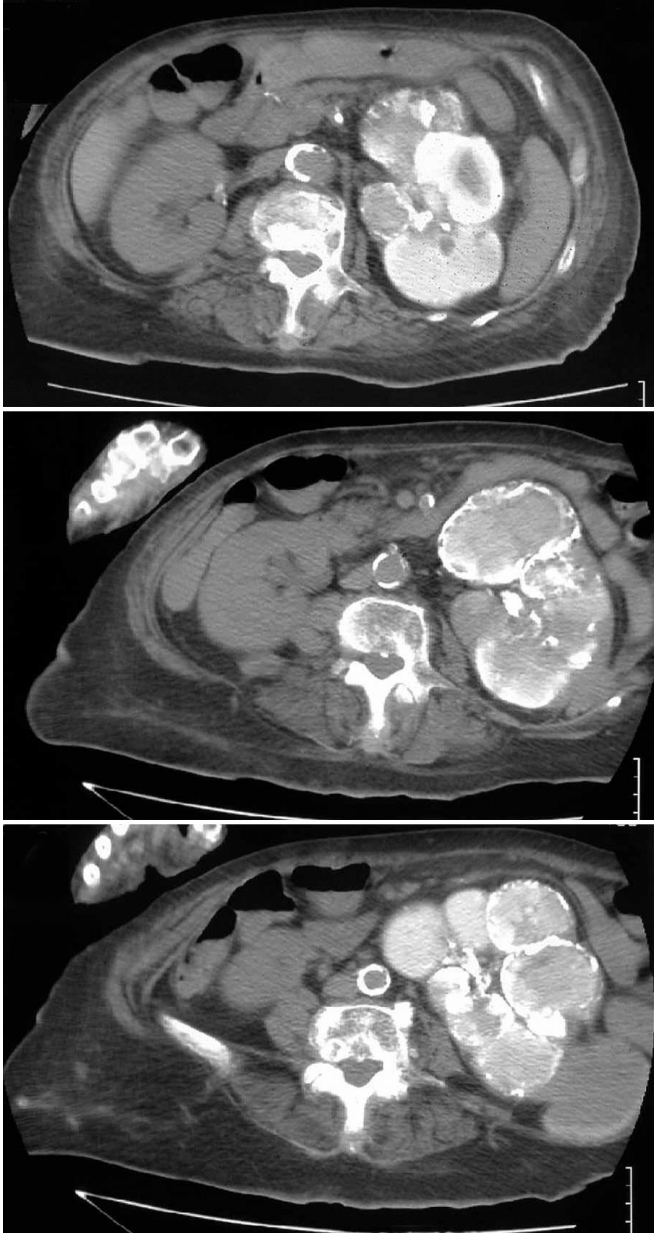

**Appendix 1:** Additional computed tomography scans showing the extent of the patient's kidney disease.
